# Supplementary material for: Identification of Differentially Expressed Genes in Resistant Tetraploid Wheat (Triticum turgidum) under Sitobion avenae (F.) Infestation
Source: MDPI journal article supplement (doi:10.3390/ijms23116012), 2022-05-27
Supplement: s1 [file s1]

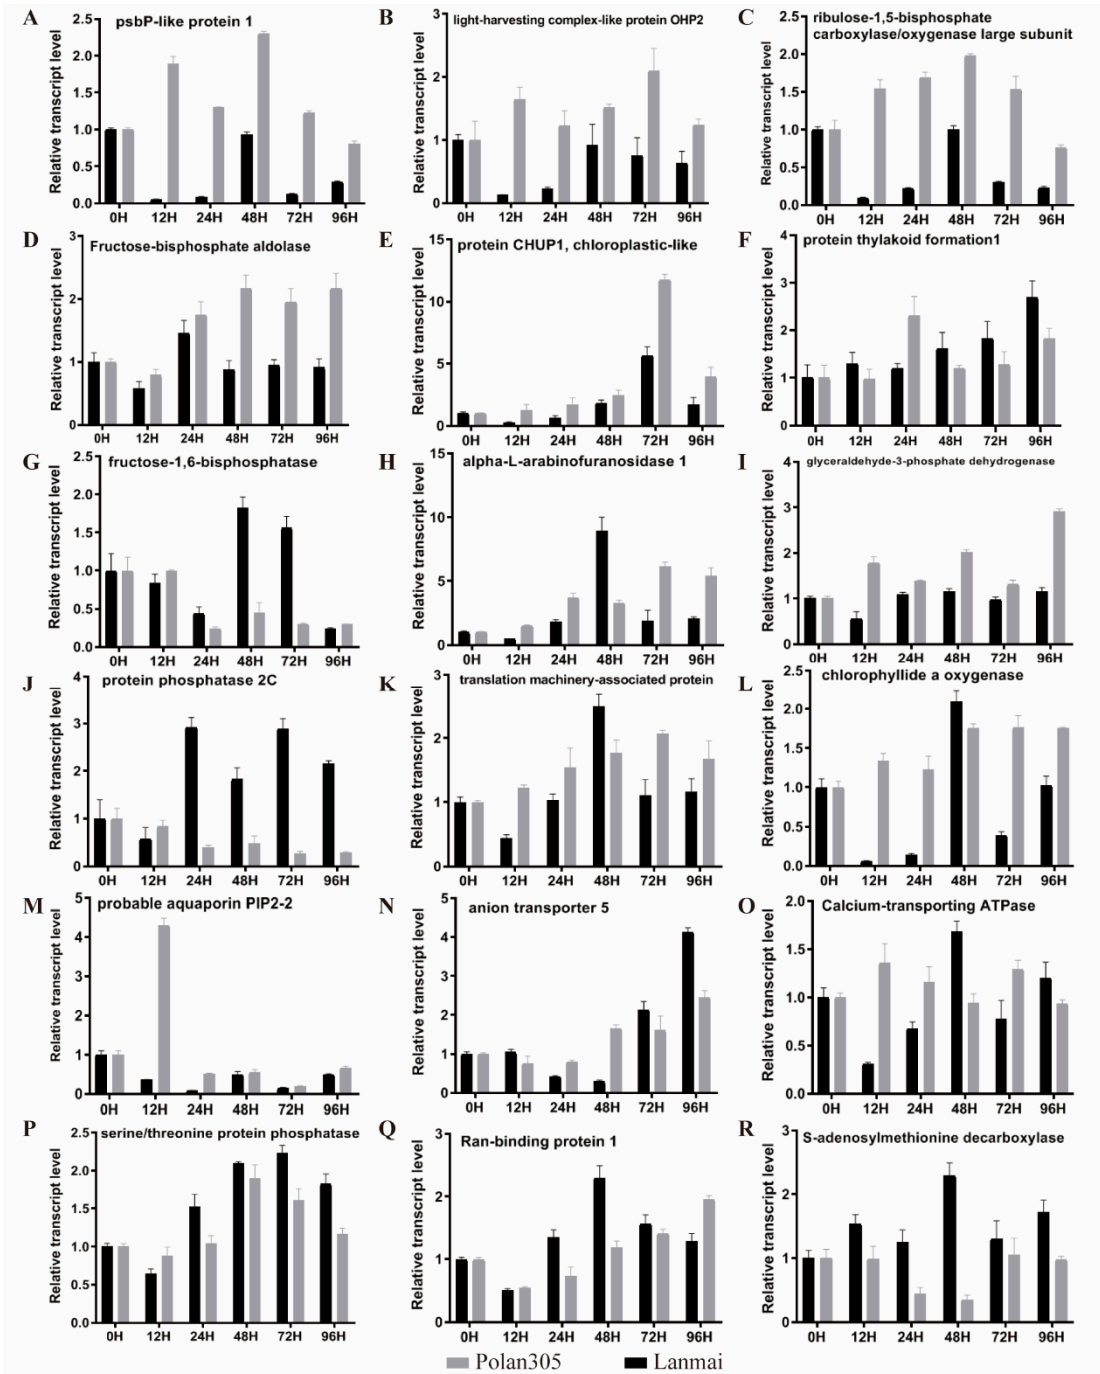

**Supplementary Figure S1.** Expression profiles of 18 representative ESTs in seedlings of the resistant (Lanmai) and susceptible (Polan305) varieties under *S. avenae* damage at different times. RT-qPCR was used to detect the expression levels of the candidate genes. *TaActin* was used as an internal control. Each value represents the mean  $\pm$  SE of three biological replicates. psbP-like protein 1 (A), light-harvesting complex-like protein OHP2 (B), ribulose-1,5-bisphosphate carboxylase/oxygenase large subunit (C), Fructose-bisphosphate aldolase (D), protein CHUP1, chloroplastic-like (E), protein thylakoid formation 1 (F), fructose-1,6-bisphosphatase (G), alpha-L-arabinofuranosidase 1 (H), glyceraldehyde-3-phosphate dehydrogenase (I), protein phosphatase 2C (J), translation machinery-associated protein (K), chlorophyllide, an oxygenase (L), probable aquaporin TIP2-2 (M), anion transporter 5 (N), calcium-transporting ATPase 9 (O), serine/threonine protein phosphatase (P), RAN-binding protein 1 (Q), S-adenosylmethionine decarboxylase (R).

**Supplementary Table S1.** The list of ESTs of SSH cDNA library from tetraploid wheat infected by *S. avenae* feeding

| d<br>b<br>U<br>se<br>E<br>r<br>S<br>T<br>I<br>-<br>I<br>d<br>-<br>d | Nr annotation                                                                                   |                                                             | wheat function<br>annnotation                        |                                                                                          | Mapman function<br>annotation                                                                                                                                                                       |      | Gene_Ontology |
|---------------------------------------------------------------------|-------------------------------------------------------------------------------------------------|-------------------------------------------------------------|------------------------------------------------------|------------------------------------------------------------------------------------------|-----------------------------------------------------------------------------------------------------------------------------------------------------------------------------------------------------|------|---------------|
|                                                                     | Protein name/organism                                                                           | P<br>E<br>va<br>lu<br>e<br>t                                | gene<br>ID                                           | annnotation                                                                              | BI<br>N<br>co<br>de                                                                                                                                                                                 | name |               |
| Photosy<br>nthesis<br>and<br>energy                                 |                                                                                                 |                                                             |                                                      |                                                                                          |                                                                                                                                                                                                     |      |               |
| 75 S<br>91 0<br>12 0<br>04 9                                        | JK7 psbP-like protein 1,<br>chloroplastic [Triticum<br>aestivum]                                | 5. 9 Traes<br>9. CS4A<br>00 1 03G0<br>E- 7 77860<br>80 % 0  | PsbP-like protein 1                                  | 1.1 PS.lightreaction.phot<br>.1. osystem II.PSII<br>2 polypeptide subunits               | GO:0005509 MF: calcium ion binding;GO:0009523 CC: photosystem II;GO:0009654 CC: photosystem II oxygen evolving complex;GO:0015979 BP: photosynthesis;GO:0019898 CC: extrinsic component of membrane |      |               |
| 75 S<br>91 0<br>12 1<br>07 3                                        | JK7 light-harvesting complex-<br>like protein OHP2,<br>chloroplastic [Triticum<br>dicoccoides]  | 5. 0 Traes<br>00. CS2D<br>E- 0 03G1<br>29 0 32930<br>% 0    | Photosystem II CP43<br>reaction center<br>protein    | 1.1 PS.lightreaction.phot<br>.1. osystem II.PSII<br>2 polypeptide subunits               | GO:0009521 CC: photosystem;GO:0009767 BP: photosynthetic electron transport chain;GO:0016020 CC: membrane;GO:0016168 MF: chlorophyll binding;GO:0019684 BP: photosynthesis, light reaction          |      |               |
| 75 S<br>91 0<br>12 1<br>09 5                                        | JK7 protein curvature thylakoid<br>1B, chloroplastic-like<br>[Triticum dicoccoides]             | 2. 0 Traes<br>00. CS1B<br>E- 0 03G0<br>07 0 62500<br>% 0    | Protein curvature<br>thylakoid<br>chloroplastic-like | 1.1 PS.lightreaction.phot<br>.2. osystem I.PSI<br>2 polypeptide subunits                 | Unknown                                                                                                                                                                                             |      |               |
| 75 S<br>91 0<br>12 2<br>17 3                                        | JK7 SKP1-like protein<br>1[Triticum dicoccoides]                                                | 3. 9 Traes<br>007. CS7D<br>E- 2 03G0<br>13 8 03670<br>6 % 0 | SKP1-like protein                                    | 1.1 PS.lightreaction.oth<br>.5. r electron carrier<br>3 (ox/red).ferredoxin<br>reductase | GO:0006511 BP: ubiquitin-dependent protein catabolic process                                                                                                                                        |      |               |
| 75 S<br>91 0<br>12 3<br>31 7                                        | JK7 photosystem I reaction<br>center subunit N,<br>chloroplastic-like<br>[Triticum dicoccoides] | 9. 9 Traes<br>00 7. CS2D<br>E- 4 03G0<br>49 7 24090<br>% 0  | Photosystem I<br>reaction center<br>subunit N        | 1.1 PS.lightreaction.phot<br>.2. osystem I.PSI<br>2 polypeptide subunits                 | GO:0009522 CC: photosystem I;GO:0015979 BP: photosynthesis                                                                                                                                          |      |               |

|      |     |                            |            |                   |                           |                                                                                                                                                     |
|------|-----|----------------------------|------------|-------------------|---------------------------|-----------------------------------------------------------------------------------------------------------------------------------------------------|
| 75 S | JK7 | Chlorophyll a-b binding    | 4. 0 Traes | Chlorophyll a-b   | 1.1 PS.lightreaction.phot | Unknown                                                                                                                                             |
| 91 0 | 160 | protein 1C, chloroplastic  | 000. CS1B  | binding protein,  | .1. osystem II.LHC-II     |                                                                                                                                                     |
| 12 5 | 82  | [Triticum urartu]          | E- 0 03G0  | chloroplastic     | 1                         |                                                                                                                                                     |
| 46 2 |     |                            | 27 0 87120 |                   |                           |                                                                                                                                                     |
|      |     |                            | % 0        |                   |                           |                                                                                                                                                     |
| 75 S | JK7 | Chlorophyll a-b binding    | 7. 0 Traes | Chlorophyll a-b   | 1.1 PS.lightreaction.phot | Unknown                                                                                                                                             |
| 91 0 | 160 | protein 1C, chloroplastic  | 000. CS5B  | binding protein,  | .1. osystem II.LHC-II     |                                                                                                                                                     |
| 12 5 | 83  | [Triticum urartu]          | E- 0 03G0  | chloroplastic     | 1                         |                                                                                                                                                     |
| 47 3 |     |                            | 25 0 88440 |                   |                           |                                                                                                                                                     |
|      |     |                            | % 0        |                   |                           |                                                                                                                                                     |
| 75 S | JK7 | photosystem II 10 kDa      | 6. 8 Traes | Photosystem II 10 | 1.1 PS.lightreaction.phot | GO:0009523 CC: photosystem II;GO:0009654 CC: photosystem II oxygen evolving complex;GO:0015979 BP: photosynthesis;GO:0042651 CC: thylakoid membrane |
| 91 0 | 160 | polypeptide, chloroplastic | 00 9. CS6A | kDa polypeptide   | .1. osystem II.PSII       |                                                                                                                                                     |
| 12 6 | 91  | [Triticum dicoccoides]     | E- 2 03G0  | family protein    | 2 polypeptide subunits    |                                                                                                                                                     |
| 55 1 |     |                            | 55 1 95100 |                   |                           |                                                                                                                                                     |
|      |     |                            | % 0        |                   |                           |                                                                                                                                                     |
| 75 S | JK7 | protein THYLAKOID          | 6. 0 Traes | Protein           | 1.1 PS.lightreaction.phot | GO:0010207 BP: photosystem II assembly;GO:0015979 BP: photosynthesis                                                                                |
| 91 0 | 160 | FORMATION1,                | 000. CS2B  | THYLAKOID         | .1. osystem II.PSII       |                                                                                                                                                     |
| 12 6 | 99  | chloroplastic [Triticum    | E- 0 03G0  | FORMATION1,       | 2 polypeptide subunits    |                                                                                                                                                     |
| 63 9 |     | dicoccoides]               | 23 0 56040 | chloroplastic     |                           |                                                                                                                                                     |
|      |     |                            | % 0        |                   |                           |                                                                                                                                                     |
| 75 S | JK7 | vulgare photosystem II     | 7. 9 Traes | Photosystem II    | 1.1 PS.lightreaction.phot | GO:0010207 BP: photosystem II assembly                                                                                                              |
| 91 1 | 161 | repair protein PSB27-H1,   | 009. CS4D  | Psb27 protein     | .1. osystem II.PSII       |                                                                                                                                                     |
| 13 1 | 48  | chloroplastic[Hordeum      | E- 0 03G0  |                   | 2 polypeptide subunits    |                                                                                                                                                     |
| 12 8 |     | vulgare]                   | 15 2 42910 |                   |                           |                                                                                                                                                     |
|      |     |                            | 2 % 0      |                   |                           |                                                                                                                                                     |
| 75 S | JK7 | ribulose-1,5-bisphosphate  | 9 Traes    | Ribulose          | 1.3 PS.calvin             | GO:0000287 MF: magnesium ion binding;GO:0015977 BP: carbon fixation;GO:0016984 MF: ribulose-bisphosphate carboxylase activity                       |
| 91 0 | 161 | carboxylase/oxygenase      | 7. CS3B    | bisphosphate      | cycle.rubisco large       |                                                                                                                                                     |
| 13 0 | 65  | large subunit [Triticum    | 0 8 03G0   | carboxylase large | .1 subunit                |                                                                                                                                                     |
| 29 1 |     | aestivum]                  | 6 44620    | chain             |                           |                                                                                                                                                     |
|      |     |                            | % 0        |                   |                           |                                                                                                                                                     |
| 75 S | JK7 | ribulose-1,5-bisphosphate  | 1 Traes    | Ribulose          | 1.3 PS.calvin             | GO:0000287 MF: magnesium ion binding;GO:0015977 BP: carbon fixation;GO:0016984 MF: ribulose-bisphosphate carboxylase activity                       |
| 91 0 | 160 | carboxylase/oxygenase      | 2. 0 CS5D  | bisphosphate      | cycle.rubisco large       |                                                                                                                                                     |
| 11 0 | 33  | large subunit [Hordeum     | 000. 03G0  | carboxylase large | .1 subunit                |                                                                                                                                                     |
| 97 2 |     | brachyantherum]            | E- 0 01600 | chain             |                           |                                                                                                                                                     |
|      |     |                            | 47 0 0     |                   |                           |                                                                                                                                                     |
|      |     |                            | % 0        |                   |                           |                                                                                                                                                     |

|      |     |                              |            |                      |     |                     |                                                                                                                                                   |
|------|-----|------------------------------|------------|----------------------|-----|---------------------|---------------------------------------------------------------------------------------------------------------------------------------------------|
| 75 S | JK7 | ribulose biphosphate         | 7. 9 Traes | Ribulose             | 1.3 | PS.calvin           | GO:0000287 MF: magnesium ion binding;GO:0015977 BP: carbon fixation;GO:0016984 MF: ribulose-bisphosphate carboxylase activity                     |
| 91 0 | 160 | carboxylase large chain-like | 00 9. CS5D | bisphosphate         | .1  | cycle.rubisco large |                                                                                                                                                   |
| 11 0 | 34  | [Triticum aestivum]          | E- 2 93640 | carboxylase large    |     | subunit             |                                                                                                                                                   |
| 98 3 |     |                              | 63 % 0     | chain                |     |                     |                                                                                                                                                   |
| 75 S | JK7 | ribulose 1,5-bisphosphate    | 4. 9 Traes | Ribulose             | 1.3 | PS.calvin           | GO:0000287 MF: magnesium ion binding;GO:0015977 BP: carbon fixation;GO:0016984 MF: ribulose-bisphosphate carboxylase activity                     |
| 91 0 | 160 | carboxylase/oxygenase        | 00 3. CS5D | bisphosphate         | .1  | cycle.rubisco large |                                                                                                                                                   |
| 11 0 | 35  | large subunit, Rubisco       | E- 7 03G0  | carboxylase large    |     | subunit             |                                                                                                                                                   |
| 99 4 |     | [Triticum aestivum]          | 11 % 0     | chain                |     |                     |                                                                                                                                                   |
| 75 S | JK7 | ribulose bisphosphate        | 1. 9 Traes | Ribulose             | 1.3 | PS.calvin           | Unknown                                                                                                                                           |
| 91 0 | 160 | carboxylase small chain      | 00 1. CS5D | bisphosphate         | .2  | cycle.rubisco small |                                                                                                                                                   |
| 12 0 | 38  | PW9, chloroplastic-like      | E- 4 03G0  | carboxylase small    |     | subunit             |                                                                                                                                                   |
| 02 7 |     | [Triticum dicoccoides]       | 10 3 41420 | chain                |     |                     |                                                                                                                                                   |
|      |     |                              | 9 % 0      |                      |     |                     |                                                                                                                                                   |
| 75 S | JK7 | ribulose bisphosphate        | 5. 9 Traes | Ribulose             | 1.3 | PS.calvin           | Unknown                                                                                                                                           |
| 91 0 | 160 | carboxylase small chain      | 00 8. CS2A | bisphosphate         | .2  | cycle.rubisco small |                                                                                                                                                   |
| 12 0 | 39  | PW9, chloroplastic-like      | E- 5 03G0  | carboxylase small    |     | subunit             |                                                                                                                                                   |
| 03 8 |     | [Triticum dicoccoides]       | 43 % 0     | chain                |     |                     |                                                                                                                                                   |
| 75 S | JK7 | ribulose bisphosphate        | 1. 9 Traes | Ribulose             | 1.3 | PS.calvin           | GO:0005524 MF: ATP binding                                                                                                                        |
| 91 0 | 161 | carboxylase/oxygenase        | 00 6. CS4B | bisphosphate         | .13 | cycle.rubisco       |                                                                                                                                                   |
| 13 1 | 66  | activase A, chloroplastic-   | E- 8 03G0  | carboxylase/oxygena. |     | interacting         |                                                                                                                                                   |
| 30 1 |     | like isoform X1 [Triticum    | E- 4 32750 | se activase          |     |                     |                                                                                                                                                   |
|      |     | dicoccoides]                 | 64 % 0     |                      |     |                     |                                                                                                                                                   |
| 75 S | JK7 | ribulose-1,5-bisphosphate    | 1. 9 Traes | Ribulose             | 1.3 | PS.calvin           | GO:0000287 MF: magnesium ion binding;GO:0015977 BP: carbon fixation;GO:0016984 MF: ribulose-bisphosphate carboxylase activity                     |
| 91 0 | 160 | carboxylase/oxygenase        | 00 0. CS3B | bisphosphate         | .1  | cycle.rubisco large |                                                                                                                                                   |
| 12 3 | 66  | large subunit [Triticum      | E- 0 03G0  | carboxylase large    |     | subunit             |                                                                                                                                                   |
| 30 6 |     | turgidum]                    | 75 0 44620 | chain                |     |                     |                                                                                                                                                   |
|      |     |                              | % 0        |                      |     |                     |                                                                                                                                                   |
| 75 S | JK7 | fructose-1,6-bisphosphatase, | 3. 9 Traes | Fructose-1,6-        | 1.3 | PS.calvin           | GO:0005975 BP: carbohydrate metabolic process;GO:0016791 MF: phosphatase activity;GO:0042132 MF: fructose 1,6-bisphosphate 1-phosphatase activity |
| 91 0 | 160 | cytosolic-like [Triticum     | 00 4. CS3D | bisphosphatase class | .7  | cycle.FBPase        |                                                                                                                                                   |
| 12 4 | 76  | dicoccoides]                 | E- 4 03G0  | 1                    |     |                     |                                                                                                                                                   |
| 40 6 |     |                              | 11 1 81950 |                      |     |                     |                                                                                                                                                   |
|      |     |                              | 9 % 0      |                      |     |                     |                                                                                                                                                   |
| 75 S | JK7 | phospholipase A1-II 7-like   | 2. 9 Traes | Fructose-            | 1.3 | PS.calvin           | GO:0003824 MF: catalytic activity;GO:0004332 MF: fructose-bisphosphate aldolase activity;GO:0006096 BP: glycolytic process                        |
| 91 0 | 161 | [Triticum dicoccoides]       | 00 6. CS4D | bisphosphate         | .6  | cycle.aldolase      |                                                                                                                                                   |
| 12 7 | 09  |                              | E- 6 03G0  | aldolase             |     |                     |                                                                                                                                                   |
| 73 9 |     |                              | 65         |                      |     |                     |                                                                                                                                                   |

|                                |                                                                            | 4 21190<br>% 0                                         |                                             |       |                        |  |                                                                                      |  |
|--------------------------------|----------------------------------------------------------------------------|--------------------------------------------------------|---------------------------------------------|-------|------------------------|--|--------------------------------------------------------------------------------------|--|
| Cell organisation and division |                                                                            |                                                        |                                             |       |                        |  |                                                                                      |  |
| 75 S<br>91 0<br>12 1<br>13 9   | JK7 cell division control protein 48 homolog E-like [Triticum dicoccoides] | 6. 9 Traes<br>7. 00 CS4B<br>2 03G0<br>6 71320<br>25% 0 | Cell division cycle protein 48-like protein | 31. 2 | cell.division          |  | GO:0005524 MF: ATP binding;GO:0016787 MF: hydrolase activity                         |  |
| 75 S<br>91 0<br>12 5<br>44 0   | JK7 protein CHUP1, chloroplastic-like [Triticum dicoccoides]               | 6. 9 Traes<br>7. 00 CS1B<br>2 03G1<br>6 19540<br>92% 0 | Protein CHUP1, chloroplastic                | 31. 1 | cell.organisation      |  | GO:0005179 MF: hormone activity;GO:0005576 CC: extracellular region                  |  |
| 75 S<br>91 0<br>12 5<br>45 1   | JK7 protein CHUP1, chloroplastic-like [Triticum dicoccoides]               | 3. 9 Traes<br>8. 00 CS1A<br>1 03G1<br>3 01410<br>63% 0 | Protein CHUP1, chloroplastic                | 31. 1 | cell.organisation      |  | GO:0005179 MF: hormone activity;GO:0005576 CC: extracellular region                  |  |
| 75 S<br>91 0<br>12 9<br>84 0   | JK7 MOB kinase activator-like 1A [Hordeum vulgare]                         | 6. 9 Traes<br>7. 00 CS6D<br>9 03G0<br>6 36970<br>60% 0 | MOB kinase activator-like 1A                | 31. 2 | cell.division          |  | Unknown                                                                              |  |
| Cel<br>1<br>wal<br>1           |                                                                            |                                                        |                                             |       |                        |  |                                                                                      |  |
| 75 S<br>91 0<br>12 7<br>65 1   | JK7 probable aquaporin TIP2-2 [Triticum dicoccoides]                       | 4. 8 Traes<br>6. 00 CS7A<br>2 03G0<br>4 81690<br>90% 0 | Aquaporin                                   | 10. 7 | cell wall.modification |  | GO:0005215 MF: transporter activity;GO:0006810 BP: transport;GO:0016020 CC: membrane |  |
| 75 S<br>91 0<br>12 9<br>90 6   | JK7 expansin-B6-like [Triticum dicoccoides]                                | 1. 9 Traes<br>4. 00 CS1B<br>8 03G0<br>7 65130<br>43% 0 | Expansin protein                            | 10. 7 | cell wall.modification |  | GO:0005576 CC: extracellular region;GO:0019953 BP: sexual reproduction               |  |

|        |     |                               |            |                       |     |                      |  |  |                                                                                         |
|--------|-----|-------------------------------|------------|-----------------------|-----|----------------------|--|--|-----------------------------------------------------------------------------------------|
| 75 S   | JK7 | probable aquaporin PIP2-2     | 3. 8 Traes | Bifunctional          |     |                      |  |  |                                                                                         |
| 91 1   | 161 | [Triticum dicoccoides]        | 00 7. CS4B | inhibitor/lipid-      | 35. | not                  |  |  |                                                                                         |
| 13 2   | 51  |                               | E- 9 03G0  | transfer protein/seed | 2   | assigned.unknown     |  |  | Unknown                                                                                 |
| 15 1   |     |                               | 85 9 03730 | storage 2S albumin    |     |                      |  |  |                                                                                         |
|        |     |                               | % 0        | superfamily protein   |     |                      |  |  |                                                                                         |
| Metabo |     |                               |            |                       |     |                      |  |  |                                                                                         |
| lism   |     |                               |            |                       |     |                      |  |  |                                                                                         |
| 75 S   | JK7 | 4-hydroxyphenylpyruvate       | 5. 9 Traes |                       |     |                      |  |  |                                                                                         |
| 91 0   | 160 | dioxygenase-like [Triticum    | 00 2. CS6B | 4-                    | 12. | N-metabolism.misc    |  |  | GO:0003868 MF: 4-hydroxyphenylpyruvate dioxygenase activity;GO:0009072 BP: aromatic     |
| 12 0   | 37  | dicoccoides]                  | E- 8 03G0  | hydroxyphenylpyruv    | 4   |                      |  |  | amino acid family metabolic process;GO:0016701 MF: oxidoreductase activity, acting on   |
| 01 6   |     |                               | 05 6 43370 | ate dioxygenase       |     |                      |  |  | single donors with incorporation of molecular oxygen;GO:0055114 BP: oxidation-reduction |
|        |     |                               | % 0        |                       |     |                      |  |  | process                                                                                 |
| 75 S   | JK7 | glucose-6-phosphate           | 2. 8 Traes |                       |     |                      |  |  |                                                                                         |
| 91 0   | 160 | isomerase 1, chloroplastic-   | 00 4. CS5D | Glucose-6-phosphate   | 4.2 | glycolysis.plastid   |  |  | GO:0004347 MF: glucose-6-phosphate isomerase activity;GO:0006094 BP:                    |
| 12 2   | 57  | like [Triticum                | E- 1 03G0  | isomerase             | .3  | branch.glucose-6-    |  |  | gluconeogenesis;GO:0006096 BP: glycolytic process                                       |
| 21 7   |     | dicoccoides]                  | 58 3 58420 |                       |     | phosphate isomerase  |  |  |                                                                                         |
|        |     |                               | % 0        |                       |     |                      |  |  |                                                                                         |
| 75 S   | JK7 | photosystem II 22 kDa         | 5. 9 Traes |                       | 13. | amino acid           |  |  |                                                                                         |
| 91 0   | 160 | protein 1, chloroplastic-like | 00 5. CS6B | AT-rich interactive   | 1.4 | metabolism.synthesis |  |  |                                                                                         |
| 12 2   | 58  | [Triticum dicoccoides]        | E- 2 03G0  | domain protein        | .1. | .branched chain      |  |  | GO:0003677 MF: DNA binding                                                              |
| 22 8   |     |                               | 46 4 88410 |                       | 1   | group.common.aceto   |  |  |                                                                                         |
|        |     |                               | % 0        |                       |     | lactate synthase     |  |  |                                                                                         |
| 75 S   | JK7 | malate dehydrogenase,         | 1. 9 Traes |                       |     | TCA / org.           |  |  | GO:0003824 MF: catalytic activity;GO:0005975 BP: carbohydrate metabolic                 |
| 91 0   | 160 | cytoplasmic-like [Triticum    | 00 6. CS1B | Malate                | 8.2 | transformation.other |  |  | process;GO:0006108 BP: malate metabolic process;GO:0016491 MF: oxidoreductase           |
| 12 3   | 60  | dicoccoides]                  | E- 0 03G0  | dehydrogenase         | .9  | organic acid         |  |  | activity;GO:0016615 MF: malate dehydrogenase activity;GO:0016616 MF: oxidoreductase     |
| 24 0   |     |                               | 99 8 50910 |                       |     | transformaitons.cyt  |  |  | activity, acting on the CH-OH group of donors, NAD or NADP as acceptor;GO:0019752 BP:   |
|        |     |                               | % 0        |                       |     | MDH                  |  |  | carboxylic acid metabolic process;GO:0030060 MF: L-malate dehydrogenase                 |
|        |     |                               |            |                       |     |                      |  |  | activity;GO:0055114 BP: oxidation-reduction process                                     |
| 75 S   | JK7 | glyceraldehyde-3-phosphate    | 1. 9 Traes |                       |     | glycolysis.plastid   |  |  |                                                                                         |
| 91 0   | 160 | dehydrogenase 1, cytosolic-   | 00 5. CS7D | Glyceraldehyde-3-     | 4.2 | branch.Glyceraldehy  |  |  | GO:0006006 BP: glucose metabolic process;GO:0016620 MF: oxidoreductase activity, acting |
| 12 3   | 68  | like [Triticum dicoccoides]   | E- 7 03G0  | phosphate             | .3  | de 3-phosphate       |  |  | on the aldehyde or oxo group of donors, NAD or NADP as acceptor;GO:0050661 MF: NADP     |
| 32 8   |     |                               | 52 4 73750 | dehydrogenase         |     | dehydrogenase        |  |  | binding;GO:0051287 MF: NAD binding;GO:0055114 BP: oxidation-reduction process           |
|        |     |                               | % 0        |                       |     |                      |  |  |                                                                                         |
| 75 S   | JK7 | ATP synthase CF1 alpha        | 4. 9 Traes |                       |     | mitochondrial        |  |  | GO:0005524 MF: ATP binding;GO:0015986 BP: ATP synthesis coupled proton                  |
| 91 0   | 160 | subunit [Triticum             | 00 5. CS5D | ATP synthase          | 9.9 | electron transport / |  |  | transport;GO:0015992 BP: proton transport;GO:0045261 CC: proton-transporting ATP        |
| 12 4   | 77  | turgidum]                     | E- 5 03G1  | subunit alpha         |     | ATP synthesis.F1-    |  |  | synthase complex, catalytic core F(1);GO:0046034 BP: ATP metabolic process;GO:0046933   |
| 41 7   |     |                               | 48 1 01600 |                       |     | ATPase               |  |  | MF: proton-transporting ATP synthase activity, rotational mechanism                     |
|        |     |                               | % 0        |                       |     |                      |  |  |                                                                                         |

|                              |                                                                  |                                                                                              |                                                               |                                                                           |                                                                                                                                                                                                    |            |                                                                                                                                                                                                                                                                                                                                                                                                                              |
|------------------------------|------------------------------------------------------------------|----------------------------------------------------------------------------------------------|---------------------------------------------------------------|---------------------------------------------------------------------------|----------------------------------------------------------------------------------------------------------------------------------------------------------------------------------------------------|------------|------------------------------------------------------------------------------------------------------------------------------------------------------------------------------------------------------------------------------------------------------------------------------------------------------------------------------------------------------------------------------------------------------------------------------|
| 75 S<br>91 0<br>12 4<br>42 8 | JK7<br>160<br>78<br>X1 [Triticum dicoccoides]                    | carbonic anhydrase,<br>chloroplastic-like isoform<br>X1 [Triticum dicoccoides]               | 3. 9 Traes<br>00 6. CS3A<br>7 03G0<br>E- 5 59360<br>80 % 0    | Carbonic anhydrase                                                        | 8.3 transformation.carbo<br>nic anhydases                                                                                                                                                          | TCA / org. | GO:0004089 MF: carbonate dehydratase activity;GO:0008270 MF: zinc ion<br>binding;GO:0015976 BP: carbon utilization                                                                                                                                                                                                                                                                                                           |
| 75 S<br>91 0<br>12 6<br>61 7 | JK7<br>160<br>97<br>vulgare]                                     | vulgare mRNA for<br>predicted protein [Hordeum<br>vulgare]                                   | 6. 9 Traes<br>00 9. CS6D<br>E- 1 03G0<br>16 1 31880<br>8 % 0  | Aldose 1-epimerase<br>family protein                                      |                                                                                                                                                                                                    |            | GO:0003824 MF: catalytic activity;GO:0005975 BP: carbohydrate metabolic<br>process;GO:0016853 MF: isomerase activity;GO:0030246 MF: carbohydrate binding                                                                                                                                                                                                                                                                     |
| 75 S<br>91 0<br>12 7<br>71 7 | JK7<br>161<br>07<br>[Triticum turgidum]                          | kinetochore-associated<br>protein KNL-2 homolog<br>[Triticum turgidum]                       | 9. 9 Traes<br>00 6. CS2A<br>E- 6 03G0<br>10 1 68220<br>5 % 0  | Acetyl-coenzyme A<br>carboxylase carboxyl<br>transferase subunit<br>alpha |                                                                                                                                                                                                    | Unknown    |                                                                                                                                                                                                                                                                                                                                                                                                                              |
| 75 S<br>91 0<br>12 8<br>77 3 | JK7<br>161<br>13<br>[Triticum dicoccoides]                       | malate dehydrogenase<br>[NADP] 1, chloroplastic-<br>like [Triticum<br>dicoccoides]           | 2. 9 Traes<br>00 9. CS7B<br>E- 1 03G0<br>16 2 54600<br>4 % 0  | Malate<br>dehydrogenase                                                   | 35. not<br>2 assigned.unknown                                                                                                                                                                      |            | GO:0003824 MF: catalytic activity;GO:0005975 BP: carbohydrate metabolic<br>process;GO:0006108 BP: malate metabolic process;GO:0016491 MF: oxidoreductase<br>activity;GO:0016615 MF: malate dehydrogenase activity;GO:0016616 MF: oxidoreductase<br>activity, acting on the CH-OH group of donors, NAD or NADP as acceptor;GO:0046554 MF:<br>malate dehydrogenase (NADP+) activity;GO:0055114 BP: oxidation-reduction process |
| 75 S<br>91 0<br>12 8<br>80 6 | JK7<br>161<br>16<br>chloroplastic-like [Triticum<br>dicoccoides] | carbamoyl-phosphate<br>synthase small chain,<br>chloroplastic-like [Triticum<br>dicoccoides] | 9. 9 Traes<br>00 7. CS5D<br>E- 2 03G0<br>12 1 39540<br>3 % 0  | Carbamoyl-<br>phosphate synthase<br>small chain                           | 23. metabolism.synthesis<br>1.1 .pyrimidine.carbamo<br>.1 yl phosphate<br>synthetase<br>amino acid<br>13. metabolism.synthesis<br>1.4 .branched chain<br>.1 group.common.aceto<br>lactate synthase |            | GO:0004088 MF: carbamoyl-phosphate synthase (glutamine-hydrolyzing)<br>activity;GO:0006207 BP: 'de novo' pyrimidine nucleobase biosynthetic process;GO:0006541<br>BP: glutamine metabolic process                                                                                                                                                                                                                            |
| 75 S<br>91 0<br>12 9<br>87 3 | JK7<br>161<br>23<br>[Triticum dicoccoides]                       | adenosylhomocysteinase<br>[Triticum dicoccoides]                                             | 2. 9 Traes<br>00 8. CS2B<br>E- 8 03G1<br>11 4 30790<br>7 % 0  | Adenosylhomocystei<br>nase                                                |                                                                                                                                                                                                    |            | GO:0004013 MF: adenosylhomocysteinase activity;GO:0006730 BP: one-carbon metabolic<br>process;GO:0019510 BP: S-adenosylhomocysteine catabolic process;GO:0051287 MF: NAD<br>binding                                                                                                                                                                                                                                          |
| 75 S<br>91 1<br>12 0<br>94 0 | JK7<br>161<br>30<br>[Triticum dicoccoides]                       | alpha-L-arabinofuranosidase<br>1-like isoform X2<br>[Triticum dicoccoides]                   | 9. 9 Traes<br>00 9. CS4B<br>E- 3 03G0<br>10 2 30100<br>1 % 0  | Alpha-L-<br>arabinofuranosidase<br>1                                      | 35. not<br>2 assigned.unknown                                                                                                                                                                      |            | GO:0046373 BP: L-arabinose metabolic process;GO:0046556 MF: alpha-L-<br>arabinofuranosidase activity                                                                                                                                                                                                                                                                                                                         |
| 75 S<br>91 1<br>12 0<br>97 3 | JK7<br>161<br>33<br>[Triticum dicoccoides]                       | sucrose synthase 2-like<br>[Triticum dicoccoides]                                            | 4. 9 Traes<br>00 3. CS4A<br>E- 9 03G1<br>10 4 11630<br>10 % 0 | Sucrose synthase                                                          | 2.2 major CHO<br>.1. metabolism.degradat<br>5 ion.sucrose.Susy                                                                                                                                     |            | GO:0005985 BP: sucrose metabolic process;GO:0016157 MF: sucrose synthase activity                                                                                                                                                                                                                                                                                                                                            |

|                            |     |                                                                                      |                                                               |                                                 |         |                                         |                                                                                                                                                                                                             |
|----------------------------|-----|--------------------------------------------------------------------------------------|---------------------------------------------------------------|-------------------------------------------------|---------|-----------------------------------------|-------------------------------------------------------------------------------------------------------------------------------------------------------------------------------------------------------------|
| 75 S                       | JK7 | alpha-L-arabinofuranosidase 1-like isoform X2                                        | 1. 9 Traes<br>00 1. CS4A<br>04 03G0<br>E- 3 50680<br>52 % 0   | Alpha-L-arabinofuranosidase 1                   | 35. 2   | not assigned.unknown                    | GO:0046373 BP: L-arabinose metabolic process;GO:0046556 MF: alpha-L-arabinofuranosidase activit                                                                                                             |
| 75 S                       | JK7 | formamidase-like                                                                     | 2. 9 Traes<br>00 9. CS3A<br>01 03G0<br>E- 8 74710<br>79 % 0   | Acetamidase/formamidase, putative               | 26. 1   | misc.misc2                              | GO:0016811 MF: hydrolase activity, acting on carbon-nitrogen (but not peptide) bonds, in linear amides                                                                                                      |
| <b>Protein degradation</b> |     |                                                                                      |                                                               |                                                 |         |                                         |                                                                                                                                                                                                             |
| 75 S                       | JK7 | ATP-dependent Clp protease ATP-binding subunit clpA-like protein CD4B, chloroplastic | 1. 9 Traes<br>00 6. CS5B<br>06 03G0<br>E- 1 29950<br>27 % 0   | ATP-dependent Clp protease ATP-binding subunit  | 29. 5.5 | protein.degradation.serine protease     | GO:0005515 MF: protein binding;GO:0005524 MF: ATP binding;GO:0019538 BP: protein metabolic process                                                                                                          |
| 75 S                       | JK7 | ATP-dependent Clp protease proteolytic subunit 3, chloroplastic-like                 | 7. 9 Traes<br>00 8. CS3A<br>E- 2 03G0<br>16 2 49990<br>1 % 0  | ATP-dependent Clp protease proteolytic subunit  | 29. 5.5 | protein.degradation.serine protease     | GO:0004252 MF: serine-type endopeptidase activity;GO:0006508 BP: proteolysis                                                                                                                                |
| 75 S                       | JK7 | protein SUPPRESSOR OF K(+) TRANSPORT GROWTH DEFECT 1                                 | 3. 9 Traes<br>00 5. CS3A<br>08 03G0<br>E- 3 11270<br>22 % 0   | Katanin p60 ATPase-containing subunit, putative | 29. 5.9 | protein.degradation.AAA type            | GO:0005524 MF: ATP binding                                                                                                                                                                                  |
| 75 S                       | JK7 | protein HHL1, chloroplastic-like                                                     | 3. 9 Traes<br>00 9. CS6B<br>00 0 03G0<br>E- 2 71270<br>62 % 0 | Protein HHL1, chloroplastic                     | 29. 5.1 | protein.degradation.ubiquitin.proteasom | Unknown                                                                                                                                                                                                     |
| 75 S                       | JK7 | 20S proteasome beta 4 subunit                                                        | 4. 9 Traes<br>00 5. CS4B<br>08 03G0<br>E- 3 07800<br>23 % 0   | Proteasome subunit beta type                    | 29. 5.1 | protein.degradation.ubiquitin.proteasom | GO:0004175 MF: endopeptidase activity;GO:0004298 MF: threonine-type endopeptidase activity;GO:0005839 CC: proteasome core complex;GO:0051603 BP: proteolysis involved in cellular protein catabolic process |



|                              |     |                                                                                          |                                                                           |                                                        |                                                                                                                                            |                                                                                                                                                                                                         |
|------------------------------|-----|------------------------------------------------------------------------------------------|---------------------------------------------------------------------------|--------------------------------------------------------|--------------------------------------------------------------------------------------------------------------------------------------------|---------------------------------------------------------------------------------------------------------------------------------------------------------------------------------------------------------|
| 75 S                         | JK7 | coiled-coil domain-<br>containing protein 12-like<br>[Triticum dicoccoides]              | 1. 9 Traes<br>00 4. CS7A<br>12 9 03G1<br>85 1 E- 4 37230<br>61 % 0        | Coiled-coil domain-<br>containing protein 12 5         | protein.degradation                                                                                                                        | Unknown                                                                                                                                                                                                 |
| 75 S                         | JK7 | ubiquitin carboxyl-terminal<br>hydrolase 12-like isoform<br>22 X1 [Triticum dicoccoides] | 2. 9 Traes<br>00 9. CS5A<br>12 9 03G0<br>86 2 E- 9 27520<br>90 % 0        | Ubiquitin carboxyl-<br>terminal hydrolase,<br>putative | 29. protein.degradation.u<br>5.1 biquitin.ubiquitin<br>1.5 protease                                                                        | GO:0005515 MF: protein binding;GO:0006511 BP: ubiquitin-dependent protein catabolic<br>process;GO:0016579 BP: protein deubiquitination;GO:0036459 MF: thiol-dependent<br>ubiquitinyl hydrolase activity |
| 75 S                         | JK7 | E3 ubiquitin-protein ligase<br>RNF25-like [Triticum<br>dicoccoides]                      | 3. 0 Traes<br>00 0. CS4B<br>13 0 03G0<br>00 6 E- 0 40780<br>49 0<br>% 0   | E3 ubiquitin-protein<br>ligase RNF25                   | 29.<br>5.1 protein.degradation.u<br>1.4 biquitin.E3.RING<br>.2                                                                             | GO:0005515 MF: protein binding;GO:0008270 MF: zinc ion binding                                                                                                                                          |
| 75 S                         | JK7 | E3 ubiquitin-protein ligase<br>At1g63170-like isoform X1<br>40 [Triticum dicoccoides]    | 3. 9 Traes<br>00 8. CS5A<br>13 1 03G0<br>04 0 E- 4 48460<br>59 % 0        | RING/U-box<br>superfamily protein                      | 29.<br>5.1 protein.degradation.u<br>1.4 biquitin.E3.RING<br>.2                                                                             | O:0005515 MF: protein binding;GO:0008270 MF: zinc ion binding                                                                                                                                           |
| <b>Protein<br/>synthesis</b> |     |                                                                                          |                                                                           |                                                        |                                                                                                                                            |                                                                                                                                                                                                         |
| 75 S                         | JK7 | 40S ribosomal protein S15-<br>like [Triticum<br>dicoccoides]                             | 1. 9 Traes<br>00 5. 0 CS5A<br>12 2 03G1<br>18 4 E- 0 04530<br>13 0<br>% 0 | 30S ribosomal<br>protein S19                           | 29.<br>2.1 protein.synthesis.ribo<br>somal<br>.2. protein.eukaryotic.40<br>1.1 S subunit.S15<br>5                                          | GO:0003723 MF: RNA binding;GO:0003735 MF: structural constituent of<br>ribosome;GO:0005840 CC: ribosome;GO:0006412 BP: translation;GO:0015935 CC: small<br>ribosomal subunit                            |
| 75 S                         | JK7 | vulgare mRNA for<br>predicted protein[Hordeum<br>vulgare]                                | 2. 9 Traes<br>00 8. CS7B<br>12 2 03G0<br>20 6 E- 4 29100<br>65 % 0        | Receptor-like protein<br>kinase                        | GO:0004672 MF: protein kinase activity;GO:0005515 MF: protein binding;GO:0005524 MF:<br>ATP binding;GO:0006468 BP: protein phosphorylation |                                                                                                                                                                                                         |
| 75 S                         | JK7 | protein SGT1 homolog<br>[Triticum dicoccoides]                                           | 1. 1 Traes<br>00 0. CS3D<br>12 2 03G0<br>23 9 E- 0. 53920<br>54 0<br>0    | SGT1                                                   | 29. protein.postranslatio<br>4 nal modification                                                                                            | GO:0005515 MF: protein binding                                                                                                                                                                          |

|      |     |                              |            |                       |                            |                                                                                             |                                                                 |
|------|-----|------------------------------|------------|-----------------------|----------------------------|---------------------------------------------------------------------------------------------|-----------------------------------------------------------------|
|      |     |                              | 0<br>%     |                       |                            |                                                                                             |                                                                 |
| 75 S | JK7 | CTD small phosphatase-like   | 5. 9 Traes | CTD small             |                            |                                                                                             |                                                                 |
| 91 0 | 160 | protein 2 [Triticum          | 006. CS5B  | phosphatase-like      | 26. misc.acid and other    |                                                                                             | GO:0016791 MF: phosphatase activity                             |
| 12 3 | 63  | dicoccoides]                 | E- 1 03G1  | protein               | 13 phosphatases            |                                                                                             |                                                                 |
| 27 3 |     |                              | 11 3 30880 |                       |                            |                                                                                             |                                                                 |
|      |     |                              | 0 % 0      |                       |                            |                                                                                             |                                                                 |
| 75 S | JK7 | neurogenic locus Notch       | 1. 9 Traes | Neurogenic locus      |                            |                                                                                             |                                                                 |
| 91 0 | 160 | protein-like [Triticum       | 00 1. CS4B | notch homolog         | 29. protein.synthesis.elo  |                                                                                             | GO:0005515 MF: protein binding                                  |
| 12 4 | 72  | dicoccoides]                 | E- 6 03G0  | protein 2             | 2.4 ngation                |                                                                                             |                                                                 |
| 36 2 |     |                              | 55 7 73610 |                       |                            |                                                                                             |                                                                 |
|      |     |                              | % 0        |                       |                            |                                                                                             |                                                                 |
| 75 S | JK7 | putative prefoldin subunit 3 | 9. 8 Traes | Prefoldin subunit 3   | 29. protein.folding        |                                                                                             | GO:0006457 BP: protein folding;GO:0016272 CC: prefoldin complex |
| 91 0 | 160 | [Triticum urartu]            | 00 8. CS5B |                       | 6                          |                                                                                             |                                                                 |
| 12 4 | 75  |                              | E- 6 03G0  |                       |                            |                                                                                             |                                                                 |
| 39 5 |     |                              | 47 4 23270 |                       |                            |                                                                                             |                                                                 |
|      |     |                              | % 0        |                       |                            |                                                                                             |                                                                 |
| 75 S | JK7 | elongation factor 1-delta 1- | 8. 9 Traes | Elongation factor 1-  | 29. protein.synthesis.elo  | GO:0003746 MF: translation elongation factor activity;GO:0005853 CC: eukaryotic translation |                                                                 |
| 91 0 | 160 | like isoform X2 [Triticum    | 00 5. CS2B | beta                  | 2.4 ngation                | elongation factor 1 complex;GO:0006414 BP: translational elongation                         |                                                                 |
| 12 5 | 89  | dicoccoides]                 | E- 0 03G0  |                       |                            |                                                                                             |                                                                 |
| 53 9 |     |                              | 44 6 47320 |                       |                            |                                                                                             |                                                                 |
|      |     |                              | % 0        |                       |                            |                                                                                             |                                                                 |
| 75 S | JK7 | chlorophyllide a oxygenase,  | 3. 9 Traes | Chlorophyllide a      |                            | GO:0005506 MF: iron ion binding;GO:0010277 MF: chlorophyllide a oxygenase [overall]         |                                                                 |
| 91 0 | 161 | chloroplastic-like           | 00 9. CS3B | oxygenase,            | 29.protein.targeting.chlo  | activity;GO:0016491 MF: oxidoreductase activity;GO:0016705 MF: oxidoreductase activity,     |                                                                 |
| 12 8 | 17  | [Triticum dicoccoides]       | E- 3 03G1  | chloroplastic         | 3.3 roplast                | acting on paired donors, with incorporation or reduction of molecular oxygen;GO:0051537 MF: |                                                                 |
| 81 7 |     |                              | 98 1 43490 |                       |                            | 2 iron, 2 sulfur cluster binding;GO:0055114 BP: oxidation-reduction process                 |                                                                 |
|      |     |                              | % 0        |                       |                            |                                                                                             |                                                                 |
| 75 S | JK7 | 40S ribosomal protein S27    | 4. 9 Traes | 40S ribosomal         | 29. protein.synthesis.ribo |                                                                                             |                                                                 |
| 91 0 | 161 | isoform X1 [Triticum         | 00 8. CS4B | protein S27           | 2.1 somal                  | GO:0003735 MF: structural constituent of ribosome;GO:0005622 CC:                            |                                                                 |
| 12 9 | 27  | dicoccoides]                 | E- 8 03G0  |                       | 2. protein.eukaryotic.40   | intracellular;GO:0005840 CC: ribosome;GO:0006412 BP: translation                            |                                                                 |
| 91 7 |     |                              | 34 2 18730 |                       | 1.2 S subunit.S27          |                                                                                             |                                                                 |
|      |     |                              | % 0        |                       |                            |                                                                                             |                                                                 |
| 75 S | JK7 | RGS domain-containing        | 2. 9 Traes | Protein kinase family |                            |                                                                                             |                                                                 |
| 91 0 | 161 | serine/threonine-protein     | 00 7. CS4B | protein, putative,    | 29. protein.postranslatio  | GO:0004672 MF: protein kinase activity;GO:0005524 MF: ATP binding;GO:0006355 BP:            |                                                                 |
| 12 9 | 28  | kinase A-like isoform X1     | E- 4 03G0  | expressed             | 4 nal modification         | regulation of transcription, DNA-templated;GO:0006468 BP: protein phosphorylation           |                                                                 |
| 92 8 |     | [Hordeum vulgare]            | 06 4 30030 |                       |                            |                                                                                             |                                                                 |
|      |     |                              | % 0        |                       |                            |                                                                                             |                                                                 |
| 75 S | JK7 | 40S ribosomal protein S6-    | 6. 9 Traes | 40S ribosomal         | 29.protein.synthesis.ribo  | GO:0003735 MF: structural constituent of ribosome;GO:0005622 CC:                            |                                                                 |
| 91 1 | 161 | like [Triticum               | 00 7. CS2D | protein S6            | 2.1 somal                  | intracellular;GO:0005840 CC: ribosome;GO:0006412 BP: translation                            |                                                                 |
|      | 31  | dicoccoides]                 | 00 0 03G0  |                       |                            |                                                                                             |                                                                 |

|      |     |              |                       |                            |                                                                                                                                         |
|------|-----|--------------|-----------------------|----------------------------|-----------------------------------------------------------------------------------------------------------------------------------------|
| 12 0 |     | E- 1 35680   |                       | .2. protein.eukaryotic.40  |                                                                                                                                         |
| 95 1 |     | 18% 0        |                       | 1.6 S subunit.S6           |                                                                                                                                         |
| 75 S |     | 6. 9 Traes   |                       |                            |                                                                                                                                         |
| 91 1 | JK7 | 00 5. CS3B   | Translation           | 29.protein.synthesis.initi | GO:0003743 MF: translation initiation factor activity;GO:0006413 BP: translational initiation                                           |
| 12 0 | 161 | 7 03G0       | machinery-            | 2.3 ation                  |                                                                                                                                         |
| 99 5 | 35  | E- 3 28550   | associated protein 22 |                            |                                                                                                                                         |
|      |     | 70% 0        |                       |                            |                                                                                                                                         |
| 75 S |     | 1. 8 Traes   |                       | 29. protein.synthesis.ribo |                                                                                                                                         |
| 91 1 | JK7 | 00 3. CS1B   |                       | 2.1 somal                  | GO:0003735 MF: structural constituent of ribosome;GO:0005622 CC: intracellular;GO:0005840 CC: ribosome;GO:0006412 BP: translation       |
| 13 0 | 161 | E- 1 03G0    | Ribosomal protein     | .2. protein.eukaryotic.60  |                                                                                                                                         |
| 03 9 | 39  | 33% 0        |                       | 2.1 S subunit.L10          |                                                                                                                                         |
| 75 S |     | 2. 9 Traes   |                       |                            |                                                                                                                                         |
| 91 1 | JK7 | 00 9. CS2B   | Protein phosphatase   | 29. protein.postranslatio  | GO:0003824 MF: catalytic activity                                                                                                       |
| 13 1 | 161 | E- 0 03G1    | 2c, putative          | 4 nal modification         |                                                                                                                                         |
| 10 6 | 46  | 70% 0        |                       |                            |                                                                                                                                         |
| 75 S |     | 5. 9 Traes   |                       |                            |                                                                                                                                         |
| 91 1 | JK7 | 00 3. CS1D   | Protein translation   | 29.protein.synthesis.initi | GO:0003743 MF: translation initiation factor activity;GO:0006413 BP: translational initiation                                           |
| 13 2 | 161 | E- 3 03G0    | factor SUI1-like      | 2.3 ation                  |                                                                                                                                         |
| 19 5 | 55  | 09% 0        | protein               |                            |                                                                                                                                         |
| 75 S |     | 1 4. 0 Traes |                       | 29.protein.synthesis.ribo  |                                                                                                                                         |
| 91 1 | JK7 | 000. CS2B    | 30S ribosomal         | 2.1 somal                  | GO:0003735 MF: structural constituent of ribosome;GO:0005840 CC: ribosome;GO:0006412 BP: translation                                    |
| 13 2 | 161 | E- 0 03G0    | protein S8            | .2. protein.eukaryotic.30  |                                                                                                                                         |
| 22 8 | 58  | 31 0 70330   |                       | 1.6 S subunit.S8           |                                                                                                                                         |
| 75 S |     | 8. 9 Traes   |                       | 29. protein.synthesis.ribo |                                                                                                                                         |
| 91 1 | JK7 | 00 0. CS4D   | 40S ribosomal         | 2.1 somal                  | GO:0003735 MF: structural constituent of ribosome;GO:0005622 CC: intracellular;GO:0005840 CC: ribosome;GO:0006412 BP: translation       |
| 13 3 | 161 | E- 5 03G0    | protein S21           | .2. protein.eukaryotic.40  |                                                                                                                                         |
| 24 0 | 60  | 49% 0        |                       | 1.2 S subunit.S21          |                                                                                                                                         |
| 75 S |     | 8. 9 Traes   |                       |                            |                                                                                                                                         |
| 91 1 | JK7 | 00 9. CS7A   | receptor kinase 1     | 29. protein.postranslatio  | GO:0004672 MF: protein kinase activity;GO:0005515 MF: protein binding;GO:0005524 MF: ATP binding;GO:0006468 BP: protein phosphorylation |
| 13 3 | 161 | E- 2 03G1    |                       | 4 nal modification         |                                                                                                                                         |
| 26 2 | 62  | 63% 0        |                       |                            |                                                                                                                                         |

|                                  |     |                                                                             |                                          |                 |                                                                         |                                                                                                                                                      |
|----------------------------------|-----|-----------------------------------------------------------------------------|------------------------------------------|-----------------|-------------------------------------------------------------------------|------------------------------------------------------------------------------------------------------------------------------------------------------|
| 75 S                             | JK7 | 5.8S ribosomal RNA (LOC119351432), rRNA[Triticum dicoccoides]               | 1.0<br>000.03G0<br>E-032540<br>6100<br>% | 1 Traes<br>CS4D | Kinase family protein                                                   | GO:0004672 MF: protein kinase activity;GO:0005524 MF: ATP binding;GO:0006468 BP: protein phosphorylation                                             |
| Cell stress response and defence |     |                                                                             |                                          |                 |                                                                         |                                                                                                                                                      |
| 75 S                             | JK7 | S-adenosylmethionine decarboxylase [Triticum dicoccoides]                   | 1.0<br>000.03G0<br>E-086970<br>1400<br>% | 1 Traes<br>CS2A | S-adenosylmethionine decarboxylase proenzyme                            | 22. polyamine metabolism.synthesis<br>1.2.SAM decarboxylase                                                                                          |
| 91 0                             | 160 |                                                                             |                                          |                 |                                                                         | GO:0004014 MF: adenosylmethionine decarboxylase activity;GO:0006597 BP: spermine biosynthetic process;GO:0008295 BP: spermidine biosynthetic process |
| 12 1                             | 46  |                                                                             |                                          |                 |                                                                         |                                                                                                                                                      |
| 10 6                             |     |                                                                             |                                          |                 |                                                                         |                                                                                                                                                      |
| 75 S                             | JK7 | heat shock factor-binding protein [Triticum dicoccoides]                    | 1.0<br>000.03G0<br>E-047440<br>4900<br>% | 1 Traes<br>CS7D | Heat shock factor-binding protein 1                                     | 20. stress.abiotic.heat<br>2.1                                                                                                                       |
| 91 0                             | 160 |                                                                             |                                          |                 |                                                                         | GO:0003714 MF: transcription corepressor activity                                                                                                    |
| 12 2                             | 51  |                                                                             |                                          |                 |                                                                         |                                                                                                                                                      |
| 15 1                             |     |                                                                             |                                          |                 |                                                                         |                                                                                                                                                      |
| 75 S                             | JK7 | putative BPI/LBP family protein Atlg04970 isoform X1 [Triticum dicoccoides] | 3.9<br>003.03G0<br>E-367430<br>81%<br>0  | 9 Traes<br>CS5B | Lipid-binding serum glycoprotein                                        | 35. not assigned.unknown                                                                                                                             |
| 91 0                             | 160 |                                                                             |                                          |                 |                                                                         | GO:0005615 CC: extracellular space;GO:0008289 MF: lipid binding                                                                                      |
| 12 5                             | 85  |                                                                             |                                          |                 |                                                                         |                                                                                                                                                      |
| 49 5                             |     |                                                                             |                                          |                 |                                                                         |                                                                                                                                                      |
| 75 S                             | JK7 | heat shock protein 90-5, chloroplastic-like [Triticum dicoccoides]          | 3.9<br>007.03G0<br>E-159590<br>1016<br>% | 9 Traes<br>CS5D | Chaperone protein htpG family protein                                   | 20. stress.abiotic.heat<br>2.1                                                                                                                       |
| 91 0                             | 160 |                                                                             |                                          |                 |                                                                         | GO:0005524 MF: ATP binding;GO:0006457 BP: protein folding;GO:0006950 BP: response to stress;GO:0051082 MF: unfolded protein binding                  |
| 12 5                             | 87  |                                                                             |                                          |                 |                                                                         |                                                                                                                                                      |
| 51 7                             |     |                                                                             |                                          |                 |                                                                         |                                                                                                                                                      |
| 75 S                             | JK7 | unnamed protein product [Triticum turgidum]                                 | 2.9<br>008.03G0<br>E-192740<br>1197<br>% | 9 Traes<br>CS1A | 2-oxoglutarate (2OG) and Fe(II)-dependent oxygenase superfamily protein | 35. not assigned.unknown                                                                                                                             |
| 91 0                             | 160 |                                                                             |                                          |                 |                                                                         | GO:0016491 MF: oxidoreductase activity;GO:0055114 BP: oxidation-reduction process                                                                    |
| 12 6                             | 92  |                                                                             |                                          |                 |                                                                         |                                                                                                                                                      |
| 56 2                             |     |                                                                             |                                          |                 |                                                                         |                                                                                                                                                      |
| 75 S                             | JK7 | UV-B-induced protein At3g17800, chloroplastic-like [Triticum aestivum]      | 5.9<br>007.03G0<br>E-699490<br>74%<br>0  | 9 Traes<br>CS2D | UV-B-induced protein, chloroplastic                                     | 20. stress.abiotic                                                                                                                                   |
| 91 0                             | 160 |                                                                             |                                          |                 |                                                                         | Unknown                                                                                                                                              |
| 12 6                             | 94  |                                                                             |                                          |                 |                                                                         |                                                                                                                                                      |
| 58 4                             |     |                                                                             |                                          |                 |                                                                         |                                                                                                                                                      |

|      |     |                            |      |       |                      |                         |  |  |                                                                                        |
|------|-----|----------------------------|------|-------|----------------------|-------------------------|--|--|----------------------------------------------------------------------------------------|
| 75 S | JK7 | unnamed protein product    | 1.0  | Traes |                      |                         |  |  |                                                                                        |
| 91 0 | 160 | [Triticum turgidum]        | 00.0 | CS6B  | Superoxide           |                         |  |  |                                                                                        |
| 12 6 | 98  |                            | E-0  | 03G0  | dismutase [Cu-Zn]    |                         |  |  | Unknown                                                                                |
| 62 8 |     |                            | 75 0 | 97190 |                      |                         |  |  |                                                                                        |
|      |     |                            | %    | 0     |                      |                         |  |  |                                                                                        |
| 75 S | JK7 | cytochrome B5-like protein | 9.4  | Traes |                      |                         |  |  |                                                                                        |
| 91 0 | 161 | [Triticum aestivum]        | 00.4 | CS5D  | Cytochrome B5-like   | 21. redox.ascorbate and |  |  |                                                                                        |
| 12 7 | 02  |                            | E-4  | 03G0  | protein              | 2 glutathione           |  |  | GO:0020037 MF: heme binding                                                            |
| 66 2 |     |                            | 13 0 | 45370 |                      |                         |  |  |                                                                                        |
|      |     |                            | 6 1  | 0     |                      |                         |  |  |                                                                                        |
| 75 S | JK7 | beta purothionin [Triticum | 5.6  | Traes |                      |                         |  |  |                                                                                        |
| 91 0 | 161 | urartu]                    | 00.0 | CS1D  | Beta purothionin     | 20. stress.abiotic      |  |  | GO:0006952 BP: defense response                                                        |
| 12 7 | 04  |                            | E-2  | 03G0  |                      | 2                       |  |  |                                                                                        |
| 68 4 |     |                            | 26 4 | 94380 |                      |                         |  |  |                                                                                        |
|      |     |                            | %    | 0     |                      |                         |  |  |                                                                                        |
| 75 S | JK7 | unnamed protein product    | 1.0  | Traes |                      |                         |  |  |                                                                                        |
| 91 0 | 161 | [Triticum turgidum]        | 00.0 | CS6B  | Superoxide           |                         |  |  |                                                                                        |
| 12 7 | 05  |                            | E-0  | 03G0  | dismutase [Cu-Zn]    |                         |  |  | Unknown                                                                                |
| 69 5 |     |                            | 36 0 | 97190 |                      |                         |  |  |                                                                                        |
|      |     |                            | %    | 0     |                      |                         |  |  |                                                                                        |
| 75 S | JK7 | wPR4a gene [Triticum       | 2.8  | Traes |                      |                         |  |  |                                                                                        |
| 91 0 | 161 | aestivum]                  | 00.3 | CS3D  | Pathogenesis-related | 20. stress.biotic       |  |  | GO:0042742 BP: defense response to bacterium;GO:0050832 BP: defense response to fungus |
| 12 8 | 10  |                            | E-6  | 03G1  | protein PR-4         | 1                       |  |  |                                                                                        |
| 74 0 |     |                            | 34 0 | 16060 |                      |                         |  |  |                                                                                        |
|      |     |                            | %    | 0     |                      |                         |  |  |                                                                                        |
| 75 S | JK7 | quinolinate synthase,      | 1.9  | Traes |                      |                         |  |  |                                                                                        |
| 91 0 | 161 | chloroplastic-like isoform | 00.8 | CS5A  | Quinolinate synthase | 35. not                 |  |  | GO:0008987 MF: quinolinate synthetase A activity;GO:0009435 BP: NAD biosynthetic       |
| 12 8 | 14  | X1 [Triticum dicoccoides]  | E-1  | 03G0  | A                    | 2 assigned.unknown      |  |  | process;GO:0051539 MF: 4 iron, 4 sulfur cluster binding                                |
| 78 4 |     |                            | 14 7 | 29800 |                      |                         |  |  |                                                                                        |
|      |     |                            | 9 %  | 0     |                      |                         |  |  |                                                                                        |
| 75 S | JK7 | cytochrome b5-like         | 2.9  | Traes |                      |                         |  |  |                                                                                        |
| 91 1 | 161 | [Triticum dicoccoides]     | 00.7 | CS3D  | Cytochrome b5        | 21. redox.ascorbate and |  |  | GO:0020037 MF: heme binding                                                            |
| 13 1 | 44  |                            | E-5  | 03G1  |                      | 2 glutathione           |  |  |                                                                                        |
| 08 4 |     |                            | 50 6 | 16990 |                      |                         |  |  |                                                                                        |
|      |     |                            | %    | 0     |                      |                         |  |  |                                                                                        |

[illegible]

|      |     |                             |       |         |                        |     |                       |                                                                                          |  |
|------|-----|-----------------------------|-------|---------|------------------------|-----|-----------------------|------------------------------------------------------------------------------------------|--|
| 75 S | JK7 | ran-binding protein 1       | 3. 0  | 1 Traes |                        |     |                       |                                                                                          |  |
| 91 0 | 160 | homolog c-like [Triticum    | 000.  | CS1B    | Ran-binding protein    | 30. | signalling.G-proteins | GO:0046907 BP: intracellular transport                                                   |  |
| 12 1 | 48  | dicoccoides]                | E- 0  | 03G0    | 1                      | 5   |                       |                                                                                          |  |
| 12 8 |     |                             | 26 0  | 67810   |                        |     |                       |                                                                                          |  |
|      |     |                             | %     | 0       |                        |     |                       |                                                                                          |  |
| 75 S | JK7 | serine/threonine protein    | 1. 9  | 1 Traes |                        |     |                       |                                                                                          |  |
| 91 0 | 160 | phosphatase 2A 55 kDa       | 00 1. | CS3B    | Late embryogenesis     | 33. | development.late      |                                                                                          |  |
| 12 3 | 61  | regulatory subunit B beta   | E- 7  | 03G1    | abundant protein       | 2   | embryogenesis         | Unknown                                                                                  |  |
| 25 1 |     | isoform [Triticum aestivum] | 47 8  | 46470   |                        |     | abundant              |                                                                                          |  |
|      |     |                             | %     | 0       |                        |     |                       |                                                                                          |  |
| 75 S | JK7 | probable pyridoxal 5'-      | 2. 9  | 1 Traes |                        |     |                       |                                                                                          |  |
| 91 0 | 160 | phosphate synthase subunit  | 00 8. | CS6B    | Pyridoxal 5'-          | 30. |                       | GO:0004359 MF: glutaminase activity;GO:0042819 BP: vitamin B6 biosynthetic               |  |
| 12 3 | 65  | PDX2 [Triticum              | E- 1  | 03G0    | phosphate synthase     | 11  | signalling.light      | process;GO:0042823 BP: pyridoxal phosphate biosynthetic                                  |  |
| 29 5 |     | dicoccoides]                | 19 8  | 29080   | subunit PdxT           |     |                       |                                                                                          |  |
|      |     |                             | %     | 0       |                        |     |                       |                                                                                          |  |
| 75 S | JK7 | aspartate aminotransferase, | 2. 9  | 1 Traes |                        |     |                       |                                                                                          |  |
| 91 0 | 160 | chloroplast-like isoform    | 00 6. | CS6D    | Aspartate              | 30. |                       | GO:0003824 MF: catalytic activity;GO:0006520 BP: cellular amino acid metabolic           |  |
| 12 4 | 70  | X2 [Triticum dicoccoides]   | E- 5  | 03G0    | aminotransferase       | 3   | signalling.calcium    | process;GO:0008483 MF: transaminase activity;GO:0009058 BP: biosynthetic                 |  |
| 34 0 |     |                             | 75 5  | 79700   |                        |     |                       | process;GO:0030170 MF: pyridoxal phosphate binding                                       |  |
|      |     |                             | %     | 0       |                        |     |                       |                                                                                          |  |
| 75 S | JK7 | lipoxygenase 2.1,           | 8. 8  | 1 Traes |                        |     | hormone               | GO:0005515 MF: protein binding;GO:0016491 MF: oxidoreductase activity;GO:0016702 MF:     |  |
| 91 0 | 160 | chloroplast-like            | 00 7. | CS5D    | Lipoxygenase           | 17. | metabolism.jasmonat   | oxidoreductase activity, acting on single donors with incorporation of molecular oxygen, |  |
| 12 4 | 74  | [Triticum dicoccoides]      | E- 6  | 02890   |                        | 7.1 | e.synthesis-          | incorporation of two atoms of oxygen;GO:0046872 MF: metal ion binding;GO:0055114 BP:     |  |
| 38 4 |     |                             | 51 0  |         |                        | .2  | degradation.lipoxyge  | oxidation-reduction process                                                              |  |
|      |     |                             | %     | 0       |                        |     | nase                  |                                                                                          |  |
| 75 S | JK7 | calcium-dependent protein   | 2. 9  | 1 Traes |                        |     |                       |                                                                                          |  |
| 91 0 | 160 | kinase [Arachis hypogaea]   | 00 3. | CS2B    | 2-oxoglutarate         |     | hormone               | GO:0016491 MF: oxidoreductase activity;GO:0055114 BP: oxidation-reduction process        |  |
| 12 4 | 79  |                             | E- 3  | 03G0    | (2OG) and Fe(II)-      | 17. | metabolism.ethylene.  |                                                                                          |  |
| 43 9 |     |                             | 27 3  | 14270   | dependent oxygenase5.1 |     | synthesis-            |                                                                                          |  |
|      |     |                             | %     | 0       | superfamily protein    |     | degradation           |                                                                                          |  |
| 75 S | JK7 | transcript variant X1,      | 2. 9  | 1 Traes |                        |     |                       |                                                                                          |  |
| 91 0 | 160 | mRNA[Triticum               | 00 6. | CS5B    | Transducin/WD-like     | 33. | development.unspeci   | GO:0005515 MF: protein binding                                                           |  |
| 12 6 | 96  | dicoccoides]                | E- 5  | 03G1    | repeat-protein         | 99  | fied                  |                                                                                          |  |
| 60 6 |     |                             | 17 6  | 33610   |                        |     |                       |                                                                                          |  |
|      |     |                             | 3 %   | 0       |                        |     |                       |                                                                                          |  |
| 75 S | JK7 | Programmed cell death       | 1. 9  | 1 Traes |                        |     |                       |                                                                                          |  |
| 91 0 | 161 | protein 4 [Triticum urartu] | 00 0. | CS2B    | Programmed cell        | 28. | DNA.unspecified       | GO:0005488 MF: binding                                                                   |  |
| 12 7 | 03  |                             | E- 4  | 03G0    | death protein 4        | 99  |                       |                                                                                          |  |
| 67 3 |     |                             | 55    |         |                        |     |                       |                                                                                          |  |

|                               |     |                                                                               |                                                              |                                                     |                                                                                                                                                                                                                                                                        |                                                                              |  |
|-------------------------------|-----|-------------------------------------------------------------------------------|--------------------------------------------------------------|-----------------------------------------------------|------------------------------------------------------------------------------------------------------------------------------------------------------------------------------------------------------------------------------------------------------------------------|------------------------------------------------------------------------------|--|
|                               |     |                                                                               | 8 92830<br>% 0                                               |                                                     |                                                                                                                                                                                                                                                                        |                                                                              |  |
| 75 S                          | JK7 | zeaxanthin epoxidase,<br>chloroplastic-like<br>[Triticum dicoccoides]         | 1. 0 Traes<br>000. CS2B<br>E- 03G0<br>39 0 87190<br>% 0      | Zeaxanthin<br>epoxidase,<br>chloroplastic           | 17. metabolism.abscisic hormone<br>1.1 acid.synthesis-<br>.1. degradation.synthesi epoxidase [overall] activity;<br>1 s.zeaxanthin GO:0005515 MF: protein binding;GO:0009507 CC: chloroplast;GO:0009540 MF: zeaxanthin<br>epoxidase process;GO:0071949 MF: FAD binding |                                                                              |  |
| 75 S                          | JK7 | unnamed protein product<br>[Triticum turgidum]                                | 2. 9 Traes<br>008. CS3A<br>E- 8 03G0<br>10 4 50770<br>3 % 0  | Evolutionarily<br>conserved C-<br>terminal region 2 | 30. signalling.calcium<br>3                                                                                                                                                                                                                                            | GO:0003723 MF: RNA binding                                                   |  |
| 75 S                          | JK7 | multiprotein-bridging factor<br>1a-like [Hordeum vulgare]                     | 6. 9 Traes<br>008. CS2A<br>E- 5 03G0<br>95 9 93970<br>% 0    | Multiprotein-<br>bridging factor,<br>putative       | 17.metabolism.ethylene.<br>5.3 induced-regulated-<br>responsive-activated                                                                                                                                                                                              | GO:0003677 MF: DNA binding;GO:0043565 MF: sequence-specific DNA binding      |  |
| 75 S                          | JK7 | IAA-amino acid hydrolase<br>ILR1-like 7 [Triticum<br>dicoccoides]             | 1. 9 Traes<br>006. CS5A<br>E- 7 03G0<br>25 2 25310<br>76 % 0 | IAA-amino acid<br>hydrolase ILR1                    | 17. hormone<br>2.1 metabolism.auxin.sy<br>nthesis-degradation                                                                                                                                                                                                          | GO:0008152 BP: metabolic process;GO:0016787 MF: hydrolase activity           |  |
| 75 S                          | JK7 | CBL-interacting protein<br>kinase 8[Triticum<br>dicoccoides]                  | 5. 8 Traes<br>008. CSU0<br>E- 5 3G00<br>57 0 60600<br>% 0    | Gluconokinase                                       | 35. not<br>2 assigned.unknown                                                                                                                                                                                                                                          | GO:0005975 BP: carbohydrate metabolic process;GO:0016301 MF: kinase activity |  |
| Tra<br>nsc<br>rip<br>tio<br>n |     |                                                                               |                                                              |                                                     |                                                                                                                                                                                                                                                                        |                                                                              |  |
| 75 S                          | JK7 | MADS-box transcription<br>factor 51-like isoform X2<br>[Triticum dicoccoides] | 3. 8 Traes<br>009. CS4D<br>E- 0 03G0<br>31 4 80300<br>% 0    | MADS-box<br>transcription factor                    | 27. RNA.regulation of<br>3.2 transcription.MADS<br>4 box transcription<br>factor family                                                                                                                                                                                | GO:0003677 MF: DNA binding;GO:0046983 MF: protein dimerization activity      |  |



|                   |     |                                                                                              |                                                             |                                                                  |                                                                                                                          |
|-------------------|-----|----------------------------------------------------------------------------------------------|-------------------------------------------------------------|------------------------------------------------------------------|--------------------------------------------------------------------------------------------------------------------------|
| 75 S              | JK7 | NAC domain-containing protein 41-like [Triticum dicoccoides]                                 | 2. 7 Traes<br>00 9. CS7B<br>E- 1 03G0<br>4 53460<br>61 % 0  | multimeric translocon complex in the outer envelope membrane 132 | Unknown                                                                                                                  |
| 75 S              | JK7 | chromatin structure-remodeling complex protein SYD-like [Triticum turgidum]                  | 7. 1 Traes<br>00 0 CS7A<br>E- 0 03G0<br>12 0 47720<br>1 % 0 | Chromatin remodeling protein-like                                | GO:0005524 MF: ATP binding;GO:0042393 MF: histone binding                                                                |
| 75 S              | JK7 | 2-hydroxy-palmitic acid dioxygenase MPO1-like [Triticum dicoccoides]                         | 2. 9 Traes<br>00 9. CS7A<br>E- 4 03G0<br>84 4 98550<br>% 0  | YGL010w-like protein                                             | 27. RNA.regulation of 3.1 transcription.C2H2 zinc finger family<br>Unknown                                               |
| 75 S              | JK7 | Uncharacterized RNA-binding protein C23E6.01c [Triticum urartu]                              | 1. 9 Traes<br>00 9. CS2A<br>E- 2 03G0<br>72 4 47560<br>% 0  | RNA-binding family protein                                       | 27. RNA.regulation of 3.9transcription.unclassified<br>GO:0003676 MF: nucleic acid binding                               |
| 75 S              | JK7 | chloroplast stem-loop binding protein of 41 kDa b, chloroplastic-like [Triticum dicoccoides] | 3. 9 Traes<br>00 7. CS5D<br>E- 4 03G0<br>42 0 11130<br>% 0  | Chloroplast stem-loop-binding protein                            | 27. RNA.regulation of 3.9transcription.unclassified<br>GO:0003824 MF: catalytic activity;GO:0050662 MF: coenzyme binding |
| 75 S              | JK7 | U2 small nuclear ribonucleoprotein B"-like [Triticum dicoccoides]                            | 4. 9 Traes<br>00 8. CS4B<br>E- 2 03G0<br>62 9 53190<br>% 0  | Small nuclear ribonucleoprotein                                  | 27. RNA.processing.spllicing<br>GO:0003676 MF: nucleic acid binding                                                      |
| 75 S              | JK7 | ubiquitin-conjugating enzyme E2 28-like isoform X1 [Panicum virgatum]                        | 7. 9 Traes<br>00 5. CS7B<br>E- 2 03G0<br>05 4 66790<br>% 0  | Ubiquitin-conjugating enzyme E2                                  | 27. RNA.regulation of 3.1 transcription.C2H2 zinc finger family<br>Unknown                                               |
| Tra<br>nsp<br>ort |     |                                                                                              |                                                             |                                                                  |                                                                                                                          |

|                              |                  |                                                                                                          |                                                            |                                                                                   |                                                                          |                                                                                                                                                                                                                                                                                                                       |
|------------------------------|------------------|----------------------------------------------------------------------------------------------------------|------------------------------------------------------------|-----------------------------------------------------------------------------------|--------------------------------------------------------------------------|-----------------------------------------------------------------------------------------------------------------------------------------------------------------------------------------------------------------------------------------------------------------------------------------------------------------------|
| 75 S<br>91 0<br>12 0<br>00 5 | JK7<br>160<br>36 | conserved hypothetical<br>protein [Talaromyces<br>stipitatus]                                            | 1. 6 Traes<br>00 7. CS3D<br>E- 8 03G0<br>15 0 90650<br>% 0 | ATP-binding ABC<br>transporter                                                    | 34. 16<br>transporters and<br>multidrug resistance<br>systems            | GO:0005524 MF: ATP binding;GO:0006810 BP: transport;GO:0016021 CC: integral<br>component of membrane;GO:0016887 MF: ATPase activity;GO:0042626 MF: ATPase<br>activity, coupled to transmembrane movement of substances;GO:0055085 BP: transmembrane<br>transport                                                      |
| 75 S<br>91 0<br>12 2<br>14 0 | JK7<br>160<br>50 | non-specific lipid-transfer<br>protein Cw18 [Triticum<br>dicoccoides]                                    | 1. 8 Traes<br>00 3. CSU0<br>E- 3 3G03<br>07 3 42400<br>% 0 | Non-specific lipid-<br>transfer protein                                           | 11. 10.<br>lipid<br>metabolism.glycolipi<br>d synthesis.DGDG<br>synthase | GO:0006869 BP: lipid transport;GO:0008289 MF: lipid binding                                                                                                                                                                                                                                                           |
| 75 S<br>91 0<br>12 2<br>16 2 | JK7<br>160<br>52 | type 1 non-specific lipid<br>transfer protein precursor<br>[Triticum turgidum]                           | 5. 8 Traes<br>00 0. CSU0<br>E- 7 3G01<br>11 0 29800<br>% 0 | Non-specific lipid-<br>transfer protein                                           | 11. 10.<br>lipid<br>metabolism.glycolipi<br>d synthesis.DGDG<br>synthase | GO:0006869 BP: lipid transport;GO:0008289 MF: lipid binding                                                                                                                                                                                                                                                           |
| 75 S<br>91 0<br>12 3<br>26 2 | JK7<br>160<br>62 | putative lipid-transfer<br>protein DIR1 [Triticum<br>dicoccoides]                                        | 2. 9 Traes<br>00 2. CSU0<br>E- 3 3G02<br>43 8 69700<br>% 0 | Protease<br>inhibitor/seed<br>storage/lipid transfer<br>protein family<br>protein | 11. 10.<br>lipid<br>metabolism.glycolipi<br>d synthesis.DGDG<br>synthase | GO:0006869 BP: lipid transport;GO:0008289 MF: lipid binding                                                                                                                                                                                                                                                           |
| 75 S<br>91 0<br>12 3<br>33 9 | JK7<br>160<br>69 | probable calcium-<br>transporting ATPase 9,<br>plasma membrane-type<br>isoform X2 [Triticum<br>aestivum] | 7. 8 Traes<br>00 6. CS5B<br>E- 3 03G0<br>97 6 37470<br>% 0 | Calcium-transporting<br>ATPase                                                    | 34. 3<br>transport.amino acids                                           | GO:0000166 MF: nucleotide binding;GO:0005388 MF: calcium-transporting ATPase<br>activity;GO:0005516 MF: calmodulin binding;GO:0005524 MF: ATP binding;GO:0016020<br>CC: membrane;GO:0016021 CC: integral component of membrane;GO:0046872 MF: metal ion<br>binding;GO:0070588 BP: calcium ion transmembrane transport |
| 75 S<br>91 0<br>12 4<br>35 1 | JK7<br>160<br>71 | nascent polypeptide-<br>associated complex subunit<br>alpha-like protein 1<br>[Triticum dicoccoides]     | 2. 8 Traes<br>00 8. CS1B<br>E- 8 03G0<br>51 2 70150<br>% 0 | Nascent polypeptide-<br>associated complex<br>subunit alpha-like<br>protein       | 28. 1<br>DNA.synthesis/chro<br>matin structure                           | Unknown                                                                                                                                                                                                                                                                                                               |
| 75 S<br>91 0<br>12 6<br>57 3 | JK7<br>160<br>93 | probable anion transporter<br>5, chloroplastic [Triticum<br>dicoccoides]                                 | 2. 9 Traes<br>00 8. CS5A<br>E- 4 03G0<br>73 5 85900<br>% 0 | Phosphate<br>transporter                                                          | 34. 99<br>transport.misc                                                 | GO:0016021 CC: integral component of membrane;GO:0055085 BP: transmembrane transport                                                                                                                                                                                                                                  |
| 75 S<br>91 0<br>12 6<br>59 5 | JK7<br>160<br>95 | phosphoribulokinase,<br>chloroplastic [Triticum<br>dicoccoides]                                          | 9. 9 Traes<br>00 3. CS6B<br>E- 8 03G0<br>53 3 84940<br>% 0 | Phosphoribulokinase                                                               | 34. 99<br>transport.misc                                                 | GO:0005524 MF: ATP binding;GO:0005975 BP: carbohydrate metabolic process;GO:0008152<br>BP: metabolic process;GO:0008974 MF: phosphoribulokinase activity;GO:0016301 MF:<br>kinase activity                                                                                                                            |

|                              |     |                                                                                 |                        |                                               |                                                     |            |                                                                          |                                                                                                                                                                                                      |
|------------------------------|-----|---------------------------------------------------------------------------------|------------------------|-----------------------------------------------|-----------------------------------------------------|------------|--------------------------------------------------------------------------|------------------------------------------------------------------------------------------------------------------------------------------------------------------------------------------------------|
| 75 S<br>91 0<br>12 8<br>82 8 | JK7 | thylakoid membrane protein<br>slr0575-like isoform X1<br>[Triticum dicoccoides] | 21-<br>00<br>E-<br>66% | 9 Traes<br>6. CS7A<br>6 03G0<br>7 70110<br>0  | acclimation of<br>photosynthesis to<br>environment  | 31.<br>4   | cell.vesicle transport                                                   | Unknown                                                                                                                                                                                              |
| 75 S<br>91 0<br>12 9<br>89 5 | JK7 | protein detoxification<br>like [Triticum<br>dicoccoides]                        | 21-<br>00<br>E-<br>95% | 9 Traes<br>8. CS5A<br>2 03G0<br>0 39600<br>0  | Protein<br>DETOXIFICATION                           | 34.<br>99  | transport.misc                                                           | GO:0006855 BP: drug transmembrane transport;GO:0015238 MF: drug transmembrane transporter activity;GO:0015297 MF: antiporter activity;GO:0016020 CC: membrane;GO:0055085 BP: transmembrane transport |
| 75 S<br>91 1<br>13 0<br>02 8 | JK7 | clathrin interactor EPSIN 1-<br>like [Triticum<br>dicoccoides]                  | 1-<br>00<br>E-<br>72%  | 8 Traes<br>8. CS2D<br>2 03G0<br>4 98390<br>0  | Clathrin interactor<br>EPSIN 1                      | 35.<br>2   | not<br>assigned.unknown                                                  | Unknown                                                                                                                                                                                              |
| 75 S<br>91 1<br>13 2<br>16 2 | JK7 | probable V-type proton<br>ATPase subunitd<br>[Triticum dicoccoides]             | 2.<br>00<br>E-<br>39%  | 8 Traes<br>7. CS3B<br>5 03G0<br>0 62890<br>0  | V-type proton<br>ATPase subunit d                   | 34.<br>1.1 | transport.p- and v-<br>ATPases.H+-<br>transporting two-<br>sector ATPase | GO:0015078 MF: hydrogen ion transmembrane transporter activity;GO:0015991 BP: ATP hydrolysis coupled proton transport;GO:0033179 CC: proton-transporting V-type ATPase, V0 domain                    |
| Un<br>kn<br>ow<br>n          |     |                                                                                 |                        |                                               |                                                     |            |                                                                          |                                                                                                                                                                                                      |
| 75 S<br>91 0<br>12 1<br>08 4 | JK7 | testis-expressed protein 2-<br>like [Triticum aestivum]                         | 2-<br>00<br>E-<br>11%  | 1 Traes<br>0. CS6A<br>0. 03G1<br>0 02870<br>0 | Testis-expressed<br>sequence 2 protein              |            |                                                                          | Unknown                                                                                                                                                                                              |
| 75 S<br>91 0<br>12 1<br>11 7 | JK7 | calphotin-like<br>[Rhopalosiphum maidis]                                        | 7.<br>00<br>E-<br>11%  | 9 Traes<br>7. CS2D<br>0 03G0<br>6 05930<br>0  | ATP sulfurylase<br>(Sulfate<br>adenylyltransferase) | 14.<br>1   | S-assimilation.ATPS                                                      | GO:0000103 BP: sulfate assimilation;GO:0004781 MF: sulfate adenylyltransferase (ATP) activity                                                                                                        |
| 75 S<br>91 0<br>12 2<br>19 5 | JK7 | protein LURP-one-related<br>15-like [Triticum<br>dicoccoides]                   | 2.<br>00<br>E-<br>51%  | 9 Traes<br>0. CS1D<br>1 03G0<br>7 76430<br>0  | Endonuclease 8-like<br>3                            |            |                                                                          | GO:0008270 MF: zinc ion binding                                                                                                                                                                      |

|      |     |                                                                                                  |                                                                |                                                     |          |                         |                                                                |
|------|-----|--------------------------------------------------------------------------------------------------|----------------------------------------------------------------|-----------------------------------------------------|----------|-------------------------|----------------------------------------------------------------|
| 75 S | JK7 | protein unc-13 homolog isoform X2 [Triticum dicoccoides]                                         | 1. 9 Traes<br>008. CS1A<br>E- 7 03G0<br>10 8 12860<br>1 % 0    | Mammalian uncoordinated<br>homology 13,<br>domain 2 | 35.<br>2 | not<br>assigned.unknown | Unknown                                                        |
| 75 S | JK7 | ubiquitin-associated protein [Triticum aestivum]                                                 | 6. 9 Traes<br>004. CS6B<br>E- 9 03G0<br>13 7 68690<br>2 % 0    | Ubiquitin-associated<br>protein                     | 35.<br>2 | not<br>assigned.unknown | GO:0005515 MF: protein binding;GO:0008270 MF: zinc ion binding |
| 75 S | JK7 | unnamed protein product [Triticum turgidum]                                                      | 1 Traes<br>6. 0 CS4B<br>000. 03G0<br>E- 0 67890<br>21 0 0<br>% | Nodulin-related<br>protein 1, putative              | 35.<br>2 | not<br>assigned.unknown | Unknown                                                        |
| 75 S | JK7 | unnamed protein product [Triticum turgidum]                                                      | 1 Traes<br>8. 0 CS6B<br>000. 03G1<br>E- 0 05100<br>94 0 0<br>% | RING finger protein                                 |          |                         | Unknown                                                        |
| 75 S | JK7 | UPF0047 protein YjbQ-like [Triticum dicoccoides]                                                 | 1. 9 Traes<br>1. 6. CS7D<br>00 3 03G1<br>E- 6 21620<br>29 % 0  | UPF0047 protein<br>YjbQ                             |          |                         | Unknown                                                        |
| 75 S | JK7 | vulgare SUMO-conjugating enzyme SCE1-like [Hordeum vulgare]                                      | 2. 9 Traes<br>008. CS5A<br>E- 4 03G0<br>12 5 04070<br>3 % 0LC  | Unknown                                             |          |                         | Unknown                                                        |
| 75 S | JK7 | protein COFACTOR ASSEMBLY OF COMPLEX C SUBUNIT B CCB1, chloroplastic-like [Triticum dicoccoides] | 2. 5 Traes<br>00. 0. CS3B<br>E- 9 03G1<br>E- 4 34650<br>04 % 0 | Cofactor assembly of<br>complex C                   | 35.<br>2 | not<br>assigned.unknown | Unknown                                                        |

**Supplementary Table S2. List RT-PCR primers designed for the analysed wheat genes**

| No. | User_Id | dbEST_Id | Nr annotation/                                                | Sequence of Primer       |                           |
|-----|---------|----------|---------------------------------------------------------------|--------------------------|---------------------------|
| Q1  | S052    | JK716082 | Chlorophyll a-b binding protein 1C, chloroplastic             | F: TTGAGAACCTTGCCGACCAC  | R: CCACACTCCCCTTACCTTGG   |
| Q2  | S069    | JK716099 | protein THYLAKOID FORMATION1, chloroplastic                   | F: CCTGAGCAATACAGGGCTGA  | R: GAACCGGCTGTAGCTGAAGT   |
| Q3  | S009    | JK716040 | psbP-like protein 1, chloroplastic                            | F: TTCGTCTACCCGTTCCGATG  | R: TGTGATGCTGACGCTCTCC    |
| Q4  | S013    | JK716043 | light-harvesting complex-like protein OHP2, chloroplastic     | F: CGCCGTGCATTTGTATGGTC  | R: TCCAAGACGCTGGTCTCTAAC  |
| Q5  | S046    | JK716076 | fructose-1,6-bisphosphatase, cytosolic-like                   | F: TTCCGTTCCGGCTCTTCT    | R: ACTGGGACACGCCTACTGC    |
| Q6  | S036    | JK716066 | ribulose-1,5-bisphosphate carboxylase/oxygenase large subunit | F: ACGTGCTCTACGTTTGGAGG  | R: CACGTAGACACTCATAACACGC |
| Q7  | S079    | JK716109 | phospholipase A1-II 7-like                                    | F: CCGCTATGCTGACGAAGAGT  | R: TACCTCCTCGAGAACCTGCT   |
| Q8  | S050    | JK716080 | protein CHUP1, chloroplastic-like                             | F: AGTGGAGCAGAGTGTTCACG  | R: GCCCTGGAGAAGCAAGAA     |
| Q9  | S100    | JK716130 | alpha-L-arabinofuranosidase 1-like isoform X2                 | F: CTTGGTTCACTAGCAGAGGC  | R: GTGGCGCATAACTTGCCATC   |
| Q10 | S030    | JK716060 | malate dehydrogenase, cytoplasmic-like                        | F: ACTTGTTCTTTGTTGACCAGG | R: GTTGCAACAACCTCCCTTGAGA |
| Q11 | S038    | JK716068 | glyceraldehyde-3-phosphate dehydrogenase 1, cytosolic-like    | F: ACGTCGAGGAGGATTTGGTC  | R: TGCTGTAACCCCACTCGTTG   |
| Q12 | S116    | JK716146 | probable protein phosphatase 2C 44                            | F: ATGAAAGGCAGAGGATTGAA  | R: GTGCGTCTTGAGGCTATGGT   |
| Q13 | S109    | JK716139 | 60S ribosomal protein L10-1                                   | F: TCTTGAGGCTGCCCCGATTG  | R: AAGCACCCCTCATACCAGTC   |

|     |      |          |                                                                                  |                           |                            |
|-----|------|----------|----------------------------------------------------------------------------------|---------------------------|----------------------------|
| Q14 | S125 | JK716155 | Protein translation factor SUI1-like protein                                     | F: GGAGCTAGGCCAGGTCATTC   | R: GCAAGACACGGTTCGACAAG    |
| Q15 | S105 | JK716135 | translation machinery-associated protein 22-like                                 | F: GAAGAGGTGAAACGACTGCC   | R: CACCACAGTAACACACTTGCG   |
| Q16 | S087 | JK716117 | chlorophyllide a oxygenase, chloroplastic-like                                   | F: ACTTCGCACCCTGGATGAAG   | R: GACTGCATCCCTCCATAGCC    |
| Q17 | S039 | JK716069 | probable calcium-transporting ATPase 9, plasma membrane-type isoform X2          | F: TAAGCGCGACGGTGGTATTC   | R: CGCTCACCAACCAGAATTGC    |
| Q18 | S063 | JK716093 | probable anion transporter 5, chloroplastic                                      | F: CTGGGTCGTTGTTGCTTTCC   | R: ACACCAACGATTCCAGGCAC    |
| Q19 | S121 | JK716151 | probable aquaporin PIP2-2                                                        | F: TTCTCCACCAAGGACTACTCG  | R: TAGAGGAAGAGGAGCGTGG     |
| Q20 | S012 | JK716042 | MADS-box transcription factor 51-like isoform X2                                 | F: GTGCAAGCACCAACAATGGG   | R: CGTTGCGCCAACATCTTCTTG   |
| Q21 | S060 | JK716090 | NAC domain-containing protein 41-like                                            | F: TCGTAGGTGCCCTGTTTCTTC  | R: CACTGGAAGTGCCTCCCATC    |
| Q22 | S044 | JK716074 | lipxygenase 2.1, chloroplastic-like                                              | F: GACCTCTTGTCCACGCACTC   | R: CGTTGTTCCACTCATCCACC    |
| Q23 | S018 | JK716048 | ran-binding protein 1 homolog c-like                                             | F: TCTCGACCACGAAGATGCAGG  | R: AGCTCTCCGTCAGCAAAGTC    |
| Q24 | S031 | JK716061 | serine/threonine protein phosphatase 2A 55 kDa regulatory subunit B beta isoform | F: GAGTTGAGTCACACCTGCAAAC | R: ACGGTGAAACATCTGTGGAC    |
| Q25 | S094 | JK716124 | multiprotein-bridging factor 1a-like                                             | F: GGCACAACCTTGCTCAGATGAT | R: ACTTCAAGGCATTACTTCTTGCT |
| Q26 | S016 | JK716046 | S-adenosylmethionine decarboxylase                                               | F: TACTATGCCACCGAGCAACC   | R: AAGTAGCGGTTCAGGACATC    |
| Q27 | S131 | JK716161 | monodehydroascorbate reductase 2, peroxisomal-like                               | F: GGCACGTCTTTCTTGCTTTC   | R: CGTTATCGGTGGTTGTCTGG    |
| Q28 | S134 | JK716164 | Bsi1 gene for putative protease inhibitor                                        | F: ACGTGAACGCCGTCTATTTTC  | R: CCACCAACGCACAATCATTA    |

|     |      |          |                                                      |                           |                         |
|-----|------|----------|------------------------------------------------------|---------------------------|-------------------------|
| Q29 | S055 | JK716085 | putative BPI/LBP family protein At1g04970 isoform X1 | F: TTTCTGGGAATAATCTTGTTGG | R: TGATGACGAAGCCCTTGATG |
| Q30 | S080 | JK716110 | <a href="#">wPR4a gene</a>                           | F: GTAATCTAGTCGCGGCAGTC   | R: ACCAAGATCGACACCAACGG |

---
